# Supplementary material for: A Quantum Walk Comb Source at Telecommunication Wavelengths
Source: Research Square preprint supplement (doi:10.21203/rs.3.rs-5442704/v1), 2025-01-03
Supplement: Supplementary file 1 [file 0dc918e16e5f51c4afa97bde.docx]

**Supplementary material**

**Single Mode Laser Characteristics**


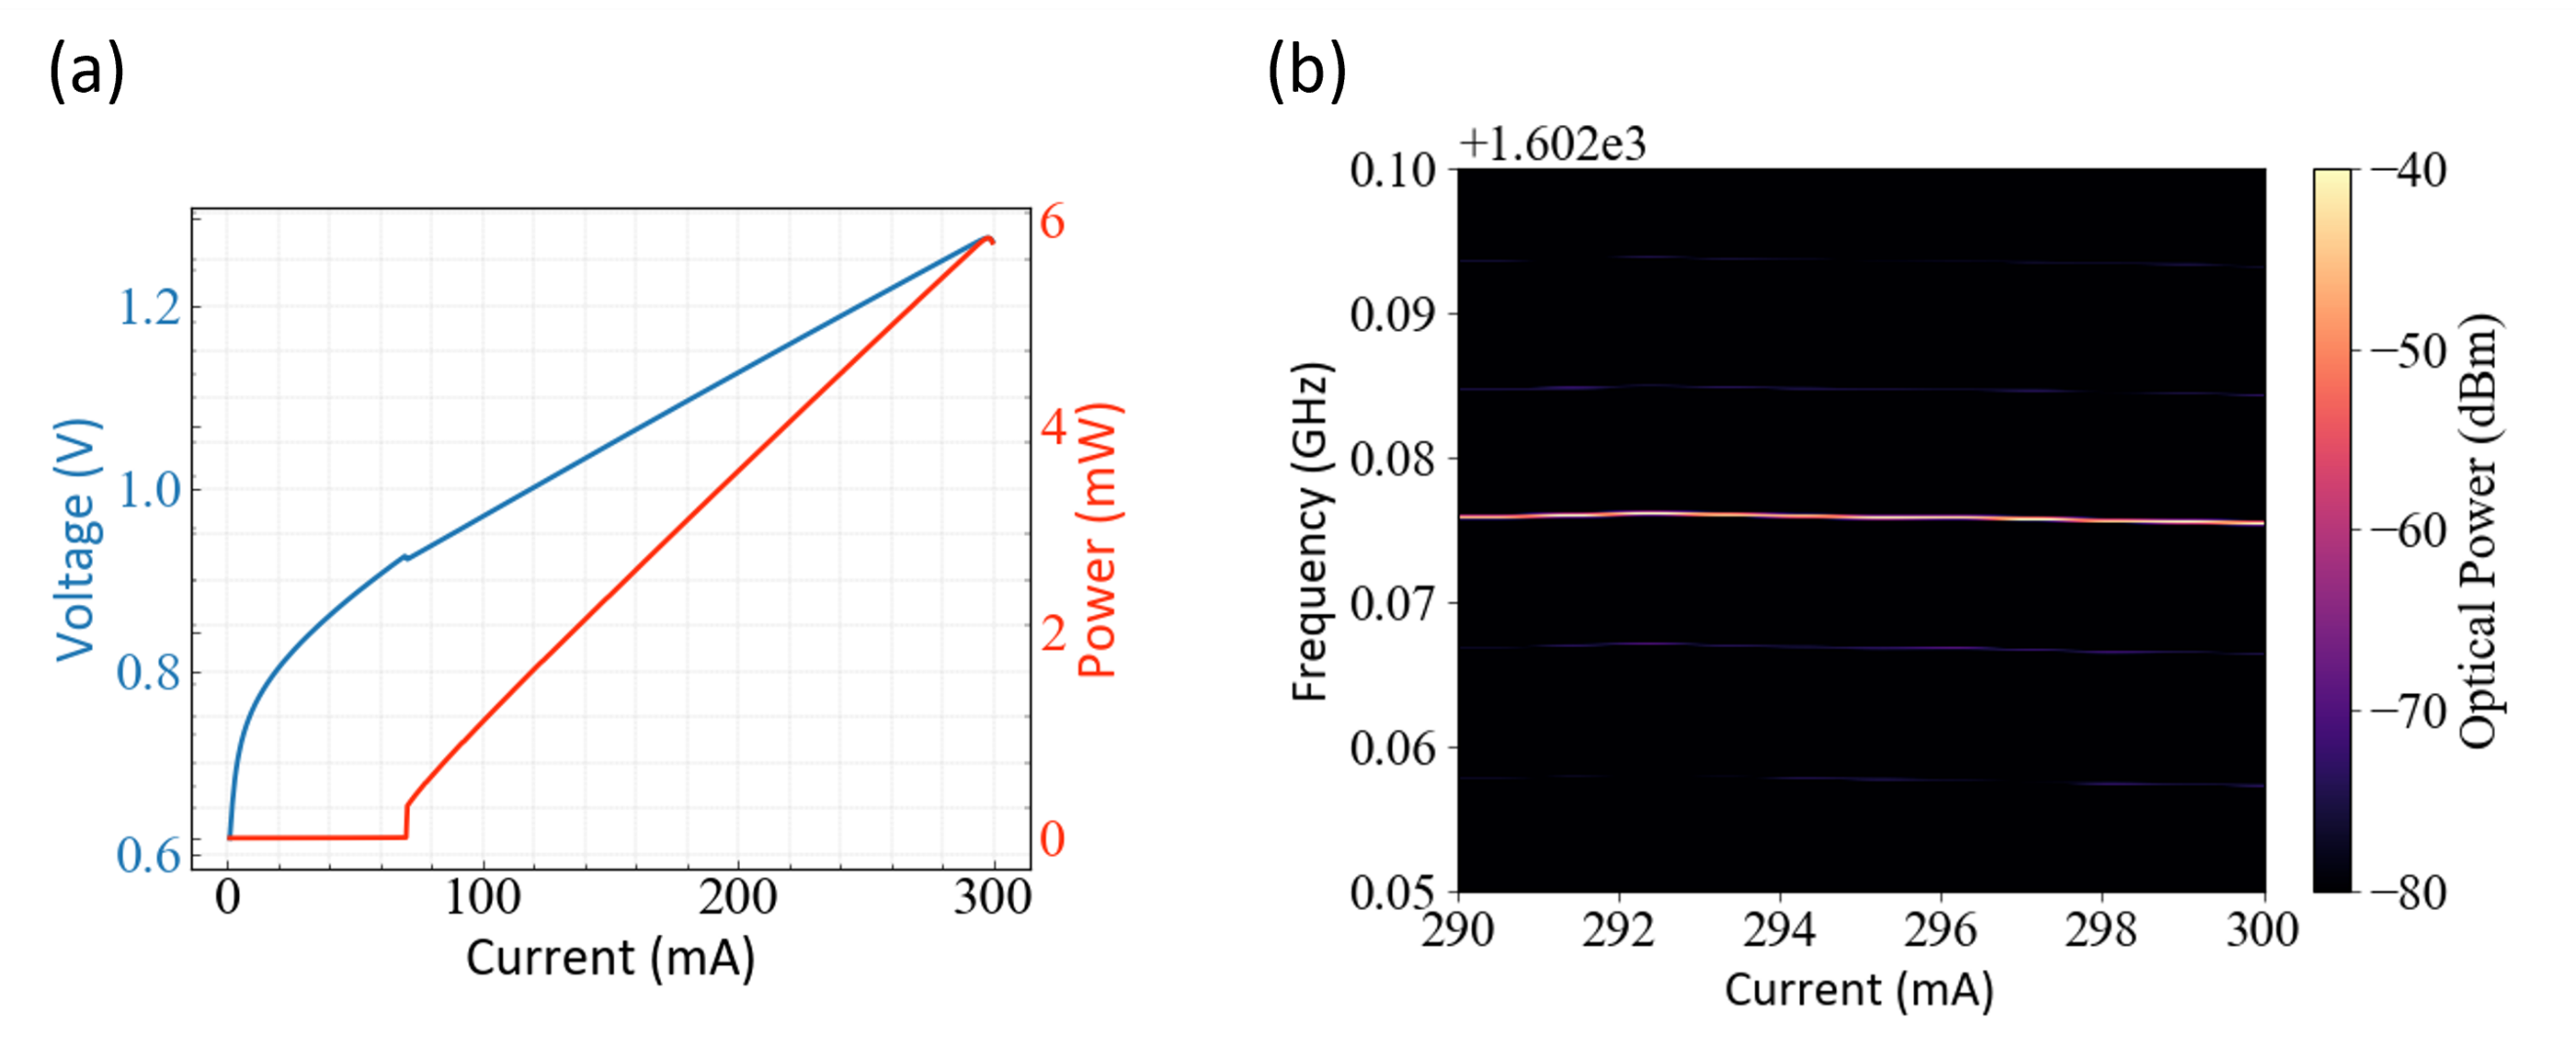


Figure .S1 **a**, Light Intensity vs. Voltage (LIV) Curve of laser operated at 19. **b**, Single-mode lasing between 290-300 mA shown.

The light-current-voltage (LIV) characteristics of the laser are measured by adjusting the laser current using a QCL2000 driver from Wavelength Electronics. Corresponding voltage values are recorded, while the emitted light is measured using a thorlabs s132c read out by a PM100USB Fig. S1a.

Figure.S1b emitted light is coupled into an optical fiber using a free-space-to-fiber lens coupler, the spectra is then measured via an optical spectrum analizer.

**Derivation of the Maxwell Bloch equations**

The Hamiltonian for the atomic energies and interactions with the external field is

, where and are the energies of the lower and upper state, is the interacting electric field, is the dipole moment, so , and and denote the lower and upper states.

A single atom has the wavefunction . However, like many macroscopic quantum descriptions, we would like to describe it as a mixed state and therefore use a density matrix . The density matrix for an ensemble of 2-level systems is given by .

The time evolution of the density matrix in system is given by the von Neumann equation (Liouville equations of motion)

, where we keep in mind that (from the definition of the density matrix).

1. We denote .
2. Normalize .
3. Add dephasing through and different lifetimes.
4. Carrier diffusion is introduced via D.
5. A pumping current J is introduced to the upper level.

Then we can write the following laser equations

To derive the “Maxwel” part of the equation, we would want to find the interaction term for the EM wave. We do this through the macroscopic polarization

So that the equation for EM waves in this medium becomes

, where is the confinement factor.

**Adding spatial modulation**

We study the first order grating contributions, so that

When we plug these inside the set of equations we found, we get a new set of equations for each parameter.

First, a pre-calculation:

Separating into different spatial Fourier components, the “Matter” equations become:

We also perform a slowly varying approximation to the field by using the field and polarization and leave only the leading terms:

And get

We notice that without the grating components, there is no direct coupling between a propagating and a counter propagating wave.

Next, we neglect the lower state population when lasing is efficient and use . We also manually add dispersion, Kerr nonlinearity and losses of the optical field in the material, and divide the contributions to the polarization from the static and the spatially modulated components. Finally, we get

**Derivation of the master equation**

is very fast so we assume the polarization is approximately following a steady state of

The population is then

, and this is what we expect. We define we get two equations

**Dispersion analysis**

Using the time resolved measurements and expansion data we derive the coupling strength C as1:

Where nmax is the highest accessible mode, the time it takes for the comb to stabilize after the RF injection, BW the final comb bandwidth after stabilization and frep the repetition frequency. The bandwidth of the quantum walk comb laser can be written as1:

Where D is a function of the second order dispersion kt:

Hence the second order effective dispersion can be written as:

Where n the refractive index in the laser cavity and c is the speed of light. Using the fact that the optical frequency comb stabilizes on a 697 GHz comb after 8.6 µs we derive the dispersion as:

Where Lc is the cavity length and LA is the length and nA refractive index of the gain chip.

References:

1. Heckelmann, I. *et al.* Quantum walk comb in a fast gain laser. *Science* **382**, 434–438 (2023).
